# Supplementary material for: Mobile and Wearable Technology for the Monitoring of Diabetes-Related Parameters: Systematic Review
Source: PubMed Central journal article supplement (PMC8212630; doi:10.2196/25138), 2021-06-03
Supplement: mhealth_v9i6e25138_app1.pdf [file mhealth_v9i6e25138_app1.pdf]

**Multimedia Appendix 1.** Newcastle-Ottawa Scale quality assessment of the selected studies.

| Articles                                | Selection | Comparability | Exposure |
|-----------------------------------------|-----------|---------------|----------|
| <b>COHORT STUDIES</b>                   |           |               |          |
| Luštrek et al. (2014)[36]               | *         |               |          |
| Luštrek et al. (2015) [37]              | *         |               |          |
| Cvetković et al. (2016) [47]            | *         |               |          |
| Calbimonte et al. (2017)[38]            | *         |               | *        |
| Fraiwan et al. (2017) [48]              | *         |               |          |
| McLean et al. (2017)[49]                | *         |               |          |
| Razjouyan et al. (2017)[57]             | *         |               | ***      |
| Turksoy et al. (2017)[50]               | *         |               | *        |
| Bartolic et al. (2018)[40]              | *         |               |          |
| Faccioli et al. (2018)[45]              | *         |               | *        |
| Groat et al. (2018)[51]                 | *         |               |          |
| McMillan et al. (2018)[46]              | *         |               |          |
| Nguyen Gia et al. (2019)[41]            | *         |               | *        |
| Rescio et al. (2019)[33]                | *         |               | *        |
| Sarda et al. (2019)[52]                 | *         |               | *        |
| Ramazi et al., (2019) [34]              | *         |               | *        |
| Sevil et al., (2019) [42]               | *         |               | *        |
| Rodriguez-Rodriguez et al., (2019) [53] | *         |               | *        |
| Sanz et al., (2019) [54]                | *         |               | *        |
| <b>CASE CONTROL STUDIES</b>             |           |               |          |
| Grewal et al. (2013) [56]               | *         |               | *        |
| Merickel et al. (2018)[32]              | *         |               | *        |
| Zherebtsov et al., (2019) [43]          |           |               | *        |
