# Supplementary material for: Mobile and Wearable Technology for the Monitoring of Diabetes-Related Parameters: Systematic Review
Source: PubMed Central journal article supplement (PMC8212630; doi:10.2196/25138), 2021-06-03
Supplement: mhealth_v9i6e25138_app3.pdf [file mhealth_v9i6e25138_app3.pdf]

Multimedia Appendix 3. Sensor use for each study.

| Manuscript                     | ACC | GM  | HRM | ECG | Camera | GPS | Thermometer | App | Magnetometer | Wi-Fi | Gyroscope | Galvanometer | Pressure | Microphone | Altimeter | Bluetooth | Oximeter | Inclinometer | OBD | Ambient light | Call logs | Respiration | Humidity | Air quality | Infrared | Heat flux | PPG | Infrared thermopile | Laser Doppler flowmetry | Skin temperature | Total wearable sensors <sup>b</sup> | Total smartphone sensors <sup>b</sup> | Total complementary sensors <sup>b</sup> | Total different sensor types <sup>d</sup> |   |   |
|--------------------------------|-----|-----|-----|-----|--------|-----|-------------|-----|--------------|-------|-----------|--------------|----------|------------|-----------|-----------|----------|--------------|-----|---------------|-----------|-------------|----------|-------------|----------|-----------|-----|---------------------|-------------------------|------------------|-------------------------------------|---------------------------------------|------------------------------------------|-------------------------------------------|---|---|
| Turksoy et al. (2017) [50]     | W   | W   | W   | W   |        |     | W           |     |              |       |           | W            |          |            |           |           |          |              |     |               |           | C           |          |             |          | W         |     |                     |                         |                  | 7                                   | 0                                     | 1                                        | 8                                         |   |   |
| Nguyen Gia et al. (2019) [41]  | W   | W   |     | W   |        |     | W&C         | W   |              | W     |           |              |          |            |           |           |          |              |     |               |           |             | C        | C           |          |           |     |                     |                         |                  | 6                                   | 0                                     | 3                                        | 8                                         |   |   |
| McLean et al. (2017) [49]      | S   |     |     |     | S      | S   |             | S   | S            |       |           |              |          |            | S         |           |          |              |     |               |           |             |          |             |          |           |     |                     |                         |                  | 0                                   | 6                                     | 0                                        | 6                                         |   |   |
| Merickel et al. (2018) [32]    | W   | W   | W   |     | C      | C   |             |     |              |       |           |              |          |            |           |           |          |              | C   |               |           |             |          |             |          |           |     |                     |                         |                  | 3                                   | 0                                     | 3                                        | 6                                         |   |   |
| Sanz et al., (2019) [54]       | W   | W&C | W   |     |        |     |             |     |              |       |           | W            |          | W          |           |           |          |              |     |               |           |             |          |             |          |           | W   |                     |                         |                  | 6                                   | 0                                     | 1                                        | 6                                         |   |   |
| Luštrek et al. (2015) [37]     | W&S |     |     | W   |        | S   |             |     |              | S     |           |              |          | S          |           |           |          |              |     |               |           |             |          |             |          |           |     |                     |                         |                  | 2                                   | 4                                     | 0                                        | 5                                         |   |   |
| Cvetković et al. (2016) [47]   | W&S |     |     | W   |        | S   |             |     |              | S     |           |              |          | S          |           |           |          |              |     |               |           |             |          |             |          |           |     |                     |                         |                  |                                     | 2                                     | 4                                        | 0                                         | 5 |   |
| Sevil et al., (2019) [42]      | W   | W   |     |     |        |     |             |     |              |       |           | W            |          |            |           |           |          |              |     |               |           |             |          |             |          | W         | W   |                     |                         |                  | 5                                   | 0                                     | 0                                        | 5                                         |   |   |
| Najafi et al. (2010) [44]      | W   |     |     |     |        |     |             | W   |              | W     |           | C            |          |            |           |           |          |              |     |               |           |             |          |             |          |           |     |                     |                         |                  | 3                                   | 0                                     | 1                                        | 4                                         |   |   |
| Bartolic et al. (2018) [40]    | W   | C   | W   |     |        |     |             | S   |              |       |           |              |          |            |           |           |          |              |     |               |           |             |          |             |          |           |     |                     |                         |                  |                                     | 2                                     | 1                                        | 1                                         | 4 |   |
| (Whelan et al., 2019) [55]     | W   | W   | W   |     |        |     |             |     |              |       |           |              |          | W          |           |           |          |              |     |               |           |             |          |             |          |           |     |                     |                         |                  |                                     | 4                                     | 0                                        | 0                                         | 4 |   |
| Faccioli et al. (2018) [45]    | W   | W   |     |     |        |     |             | S   |              |       |           |              |          |            |           |           |          |              |     |               |           |             |          |             |          |           |     |                     |                         |                  |                                     | 2                                     | 1                                        | 0                                         | 3 |   |
| Groat et al. (2018) [51]       |     | W   | W   |     |        |     |             | S   |              |       |           |              |          |            |           |           |          |              |     |               |           |             |          |             |          |           |     |                     |                         |                  |                                     | 2                                     | 1                                        | 0                                         | 3 |   |
| McMillan et al. 2018 [46]      | W   | W   |     |     |        |     |             |     |              |       |           |              |          |            |           | W         |          |              |     |               |           |             |          |             |          |           |     |                     |                         |                  |                                     | 3                                     | 0                                        | 0                                         | 3 |   |
| Sarda et al. (2019) [52]       | S   |     |     |     |        |     |             |     |              |       |           |              |          |            |           |           |          |              | S   | S             |           |             |          |             |          |           |     |                     |                         |                  |                                     | 0                                     | 3                                        | 0                                         | 3 |   |
| Grewal et al. (2013) [56]      | W   |     |     |     |        |     |             |     |              |       | W         |              |          |            |           |           |          |              |     |               |           |             |          |             |          |           |     |                     |                         |                  |                                     | 2                                     | 0                                        | 0                                         | 2 |   |
| Luštrek et al. (2014) [36]     | W&S |     | W   |     |        |     |             |     |              |       |           |              |          |            |           |           |          |              |     |               |           |             |          |             |          |           |     |                     |                         |                  |                                     |                                       | 2                                        | 1                                         | 0 | 2 |
| Calbimonte et al. (2017) [38]  | W   |     |     | W   |        |     |             |     |              |       |           |              |          |            |           |           |          |              |     |               |           |             |          |             |          |           |     |                     |                         |                  |                                     |                                       | 2                                        | 0                                         | 0 | 2 |
| Fraiwan et al. (2017) [48]     |     |     |     |     | C      |     |             |     |              |       |           |              |          |            |           |           |          |              |     |               |           |             |          | C           |          |           |     |                     |                         |                  |                                     |                                       | 0                                        | 0                                         | 2 | 2 |
| Razjouyan et al. (2017) [57]   | W   |     |     | W   |        |     |             |     |              |       |           |              |          |            |           |           |          |              |     |               |           |             |          |             |          |           |     |                     |                         |                  |                                     |                                       | 2                                        | 0                                         | 0 | 2 |
| Reddy et al. (2017) [39]       |     |     |     |     | S      |     |             |     |              |       |           |              |          |            |           | C         |          |              |     |               |           |             |          |             |          |           |     |                     |                         |                  |                                     | 0                                     | 1                                        | 1                                         | 2 |   |
| Rescio et al. (2019) [33]      |     |     |     |     |        |     | W           |     |              |       |           | W            |          |            |           |           |          |              |     |               |           |             |          |             |          |           |     |                     |                         |                  |                                     |                                       | 2                                        | 0                                         | 0 | 2 |
| Ramazi et al., (2019) [34]     | W   | W   |     |     |        |     |             |     |              |       |           |              |          |            |           |           |          |              |     |               |           |             |          |             |          |           |     |                     |                         |                  |                                     |                                       | 2                                        | 0                                         | 0 | 2 |
| Zherebtsov et al., (2019) [43] |     |     |     |     |        |     | W           |     |              |       |           |              |          |            |           |           |          |              |     |               |           |             |          |             |          |           | W   |                     |                         |                  |                                     |                                       | 2                                        | 0                                         | 0 | 2 |
